# Supplementary material
Source: PubMed Central journal article supplement (PMC6363361)
Supplement: NIHMS1003456-supplement-sup.pdf [file NIHMS1003456-supplement-sup.pdf]

Supplemental Appendix.

Supplemental Methods:

Genetic Studies

Amplifications were performed as follows: 95°C denaturation, 30 seconds; 62°C annealing, 30 seconds; 72°C extension, 1min; 35 cycles. Amplified DNA fragments were sequenced by the conventional method. Primers were developed for amplification and sequencing (Table S1). All *MKRN3* variants were confirmed in two independent PCR products and sequencing reactions of both strands.

Table S1. Primers used for PCR amplification and sequencing reactions of *MKRN3* promoter region.

| Primers for PCR amplification           | Internal primers                        |
|-----------------------------------------|-----------------------------------------|
| P1F: 5'GAA ACA AAG GGC TGC<br>CAT GA 3' | P1F: 5'GAA ACA AAG GGC TGC CAT<br>GA 3' |
| P2R: 5'ATC TGG AGC AGC AGA<br>TTC CC 3' | P1R: 5'GGC AGT CCC TAA GTC CCT<br>TC 3' |
|                                         | P2F: 5'CGC GAT CGG GCA TTA AAA<br>GA 3' |
|                                         | P2R: 5'ATC TGG AGC AGC AGA TTC<br>CC 3' |
